# Supplementary material
Source: Springer Nature journal article supplement (https://www.springermedizin.de/resource/supplementary/13256_2012_2279_MOESM4_ESM.pdf/9649346)

# Tidal volume (ml)

600  
500  
400  
300  
200  
100  
0

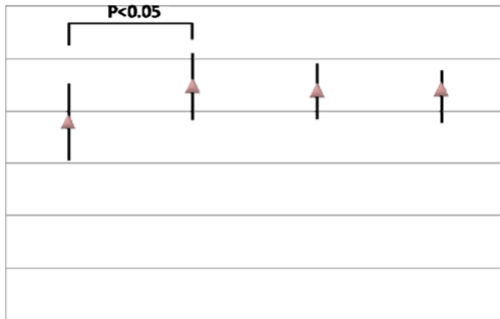

NIGHT(ST)      DAY(ST)      NIGHT(AVAPS)      DAY(AVAPS)

|           |       |       |       |       |
|-----------|-------|-------|-------|-------|
| +SD       | 451.8 | 509.8 | 490.5 | 477.2 |
| -SD       | 306   | 383.2 | 385.7 | 377.4 |
| ▲ Average | 378.9 | 446.5 | 438.1 | 440.8 |

Supplement: MOESM4 [file 9649346]
